# Supplementary material
Source: PubMed Central journal article supplement (PMC4909599)
Supplement: NIHMS745125-supplement.pdf [file NIHMS745125-supplement.pdf]

## A Common Polymorphism in a Williams Syndrome Gene Predicts Amygdala Reactivity and Extraversion in Healthy Adults

### *Supplement 1*

#### Supplementary Analyses

##### Proxy SNP rs6964833

We examined whether results obtained using imputed genotype data were maintained when using a proxy SNP (rs6964833) that was genotyped in a subset of the sample ( $n = 617$ ). Similar to results for imputed genotype rs13227433, the proxy SNP rs6964833 predicted left threat-related amygdala reactivity,  $B = -.08$ ,  $SE = .03$ ,  $Beta = -.23$ ,  $p = .013$  and marginally predicted right threat-related amygdala reactivity,  $B = -.05$ ,  $SE = .03$ ,  $Beta = -.18$ ,  $p = .056$ . This therefore increases our confidence in results based on the imputed genotype.

##### Genotype Grouping

Due to the small number of minor C allele homozygotes in the sample (Caucasian = 22, African American  $n = 2$ , Asian  $n = 3$ ), we grouped these individuals with heterozygotes. To test whether this assumed dominant model reflected our data, we examined whether A allele homozygotes and/or C allele homozygotes differed from heterozygotes. Consistent with our genotype coding model, there was a significant difference in threat-related left amygdala reactivity between the CA and AA groups ( $B = -.09$ ,  $SE = .04$ ,  $p = .013$ ), but not between the CA and CC groups ( $B = .05$ ,  $SE = .09$ ,  $p = .557$ ). A similar, albeit trending pattern was observed with the right amygdala model (CA vs. AA,  $p = .072$ ; CA vs. CC,  $p = .381$ ).

### **Results Within Racial Sub-groups**

To examine whether results held across racial sub-groups, we ran analyses reported in the main text within each group individually. Results were in the same direction for each group, but as expected, significance levels were reduced due to the reduction in sample size. Results for the effect of rs13227433 on left amygdala reactivity for each subgroup were as follows: Caucasian,  $B = -.11$ ,  $SE = .04$ ,  $Beta = -.27$ ,  $p = .012$ ; African American,  $B = -.14$ ,  $SE = .08$ ,  $Beta = -.44$ ,  $p = .100$ ; Asian,  $B = -.06$ ,  $SE = .07$ ,  $Beta = -.17$ ,  $p = .408$ . Results for the right amygdala were similar: Caucasian,  $B = -.07$ ,  $SE = .03$ ,  $Beta = -.21$ ,  $p = .050$ ; African American,  $B = -.03$ ,  $SE = .08$ ,  $Beta = -.12$ ,  $p = .676$ ; Asian,  $B = -.05$ ,  $SE = .06$ ,  $Beta = -.16$ ,  $p = .385$ . In addition, constraining parameter estimates to be equal across the three groups did not result in a significant reduction in model fit for the left amygdala,  $\Delta\chi^2(2) = .53$ ,  $p = .767$ , or right amygdala,  $\Delta\chi^2(2) = .21$ ,  $p = .900$ , indicating there were no significant differences in parameter estimates for the effect of genotype across the 3 racial sub-groups.

**Table S1. Counts of past and current psychiatric diagnoses**

| <b>Diagnosis</b>                           | <b>Count</b> |
|--------------------------------------------|--------------|
| Major depressive disorder                  | 39           |
| Bipolar disorder I or II                   | 7            |
| Bipolar disorder – Not otherwise specified | 13           |
| Hypomanic episode                          | 5            |
| Panic disorder                             | 10           |
| Agoraphobia                                | 10           |
| Social anxiety disorder                    | 8            |
| Generalized anxiety disorder               | 15           |
| Obsessive compulsive disorder              | 10           |
| Posttraumatic stress disorder              | 1            |
| Alcohol abuse/dependence                   | 86           |
| Marijuana abuse/dependence                 | 34           |
| Eating disorder                            | 5            |
| Antisocial personality disorder            | 1            |
| Borderline personality disorder            | 2            |

Some participants have multiple comorbid diagnoses, thus counts of individual diagnoses total higher than the number of participants with any psychiatric diagnosis ( $n = 157$ ).

**Table S2. Regression results**

|                                                                               | <b>B</b> | <b>SE</b> | <b><i>p</i>-value</b> |
|-------------------------------------------------------------------------------|----------|-----------|-----------------------|
| <b>Gene to brain: rs13227433 genotype predicting left amygdala reactivity</b> |          |           |                       |
| rs13227433                                                                    | -.10     | .03       | .005                  |
| Age                                                                           | -.01     | .01       | .468                  |
| Diagnosis                                                                     | -.01     | .03       | .688                  |
| Sex                                                                           | -.03     | .03       | .358                  |
| MDS 1                                                                         | .003     | .003      | .382                  |
| MDS 2                                                                         | .002     | .002      | .345                  |
| MDS 3                                                                         | .001     | .01       | .865                  |
| MDS 4                                                                         | .008     | .03       | .801                  |
| <b>Brain to behavior: Left amygdala reactivity predicting extraversion</b>    |          |           |                       |
| <i>Women</i>                                                                  |          |           |                       |
| Left amygdala reactivity                                                      | -5.59    | 2.73      | .041                  |
| Age                                                                           | -1.06    | .68       | .121                  |
| Diagnosis                                                                     | 4.34     | 2.29      | .058                  |
| STAI Trait anxiety                                                            | -.79     | .11       | <.001                 |
| <i>Men</i>                                                                    |          |           |                       |
| Left amygdala reactivity                                                      | 1.66     | 2.44      | .498                  |
| Age                                                                           | -.17     | .78       | .831                  |
| Diagnosis                                                                     | 1.40     | 2.48      | .573                  |
| STAI Trait Anxiety                                                            | -.81     | .11       | <.001                 |

MDS, multidimensional scaling components; STAI, State Trait Anxiety Inventory.
